# Supplementary material for: Cortical aging – new insights with multiparametric quantitative MRI
Source: publisher site journal article supplement (doi:10.18632/aging.103629), 2020-08-27
Supplement: Supplementary file [file aging-v12i16-103629-supplementary-material-SD1.pdf]

**SUPPLEMENTARY FIGURES**

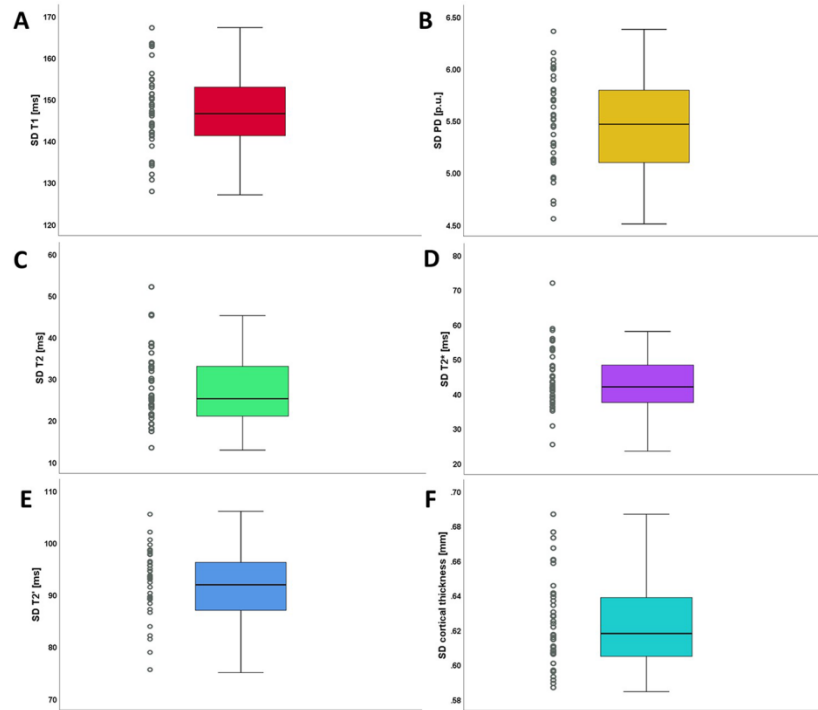

**Supplementary Figure 1. Standard deviations of cortical MRI parameters across the cortex.** (A) standard deviation of T1; (B) standard deviation of PD; (C–E) standard deviations of T2, T2\* and T2'; (F) standard deviation of the cortical thickness. In each panel, each data point on the left reflects the individual standard deviation across the cortex for a single participant for the respective cortical parameter. The boxplots on the right illustrate the median across the group of the standard deviations across the cortex, along with the 1<sup>st</sup> and the 3<sup>rd</sup> quartile as well as the minimum and the maximum value. Circles with a distance of more than 1.5 box lengths from the median represent outliers which were not considered for calculation of the minimum and the maximum. SD: standard deviation; ms: milliseconds; p.u.: percentage units; mm: millimeters.

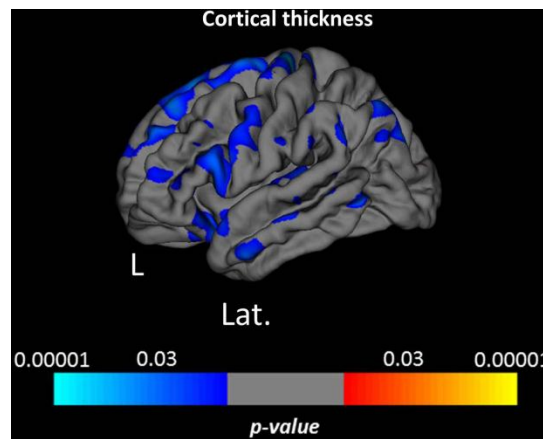

**Supplementary Figure 2. Cortical clusters indicating a significant association between age and cortical thickness before correction for multiple comparisons for the left lateral hemisphere.** The scale bar displays the level of significance. Cold colours demonstrate a negative association with age in the respective regions. L: left; Lat.: lateral.
